# Supplementary material for: Photothermal catalytic properties of layered titanium chalcogenide nanomaterials
Source: Royal Society of Chemistry journal article supplement (doi:10.1039/c9dt03798e), 2019-12-18
Supplement: c9dt03798e1.pdf [file c9dt03798e1.pdf]

## Supporting Information

### Photothermal catalytic properties of layered titanium chalcogenide nanomaterials

*Sherif Okeil<sup>‡</sup>, Sandeep Yadav<sup>‡</sup>, Michael Bruns, Alexander Zintler, Leopoldo Molina-Luna and Jörg J. Schneider*

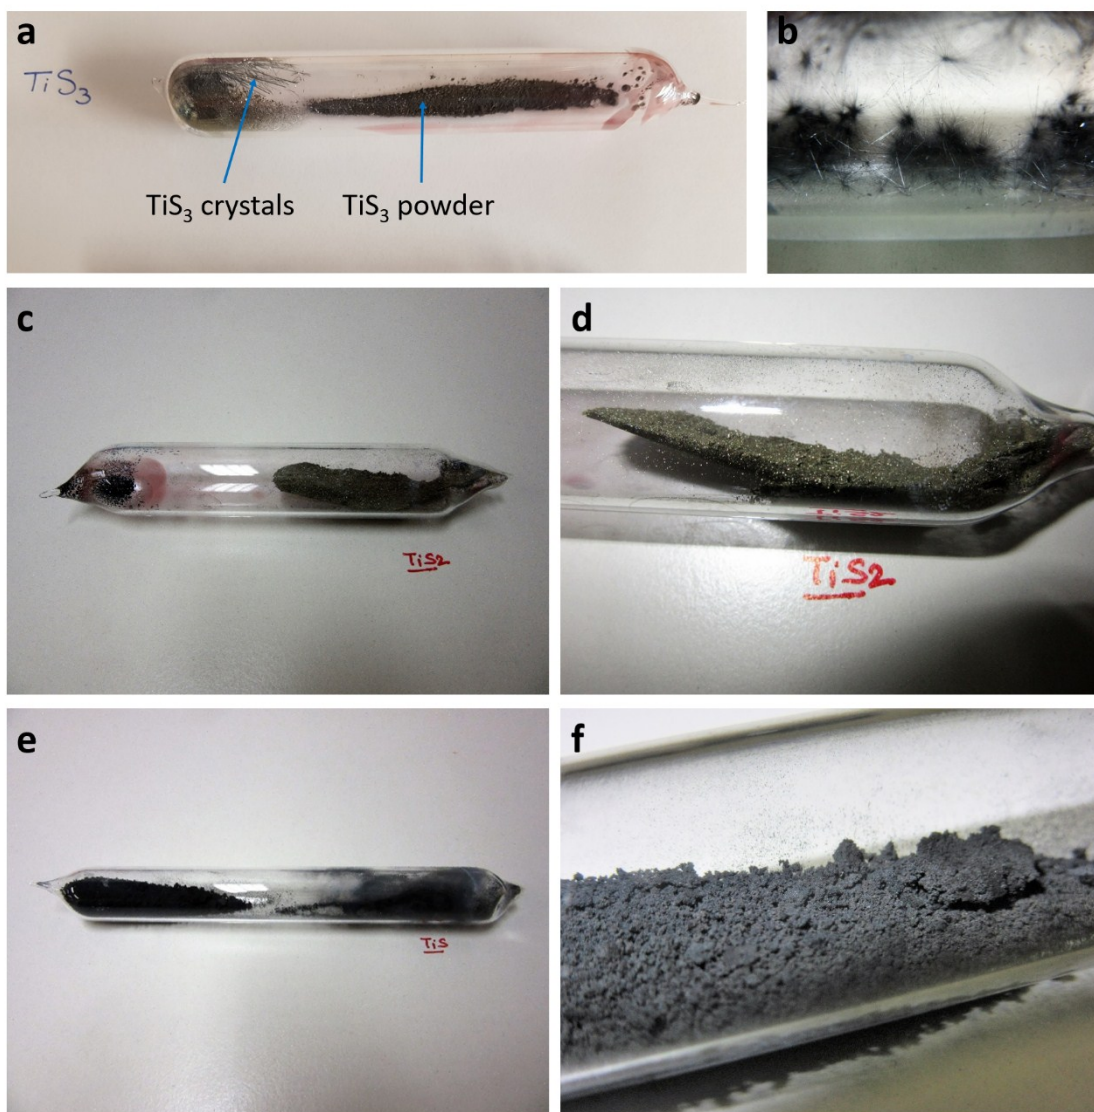

**Figure S1.** Optical photograph of (a) the ampule after  $\text{TiS}_3$  synthesis showing the presence of  $\text{TiS}_3$  crystals and powder side-by-side, (b) magnification of the nucleation points on the inner ampule wall with  $\text{TiS}_3$  crystals attached, (c) the ampule after  $\text{TiS}_2$  synthesis, (d) magnification of the  $\text{TiS}_2$  ampule showing the dark greenish shiny  $\text{TiS}_2$  crystals, (e) the ampule after  $\text{1t-TiS}$  synthesis, (f) magnification of the powder obtained from the  $\text{1t-TiS}$  synthesis.

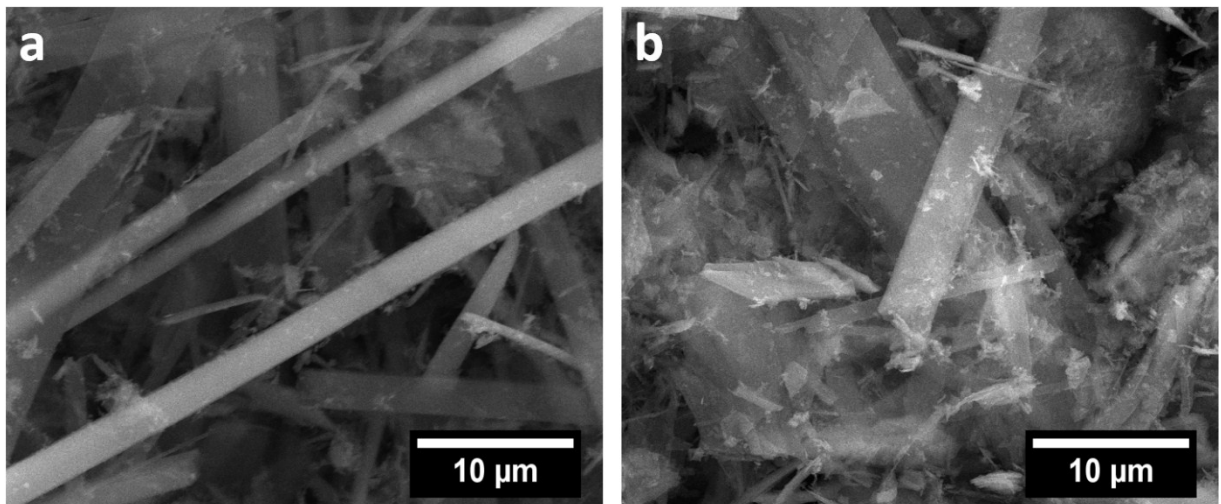

**Figure S2.** SEM image of  $\text{TiS}_3$  powder heated at  $450^\circ\text{C}$  under argon atmosphere for (a) 20 min ( $\text{TiS}_{3-x}/20$  min) and (b) 60 min ( $\text{TiS}_{3-x}/60$  min).

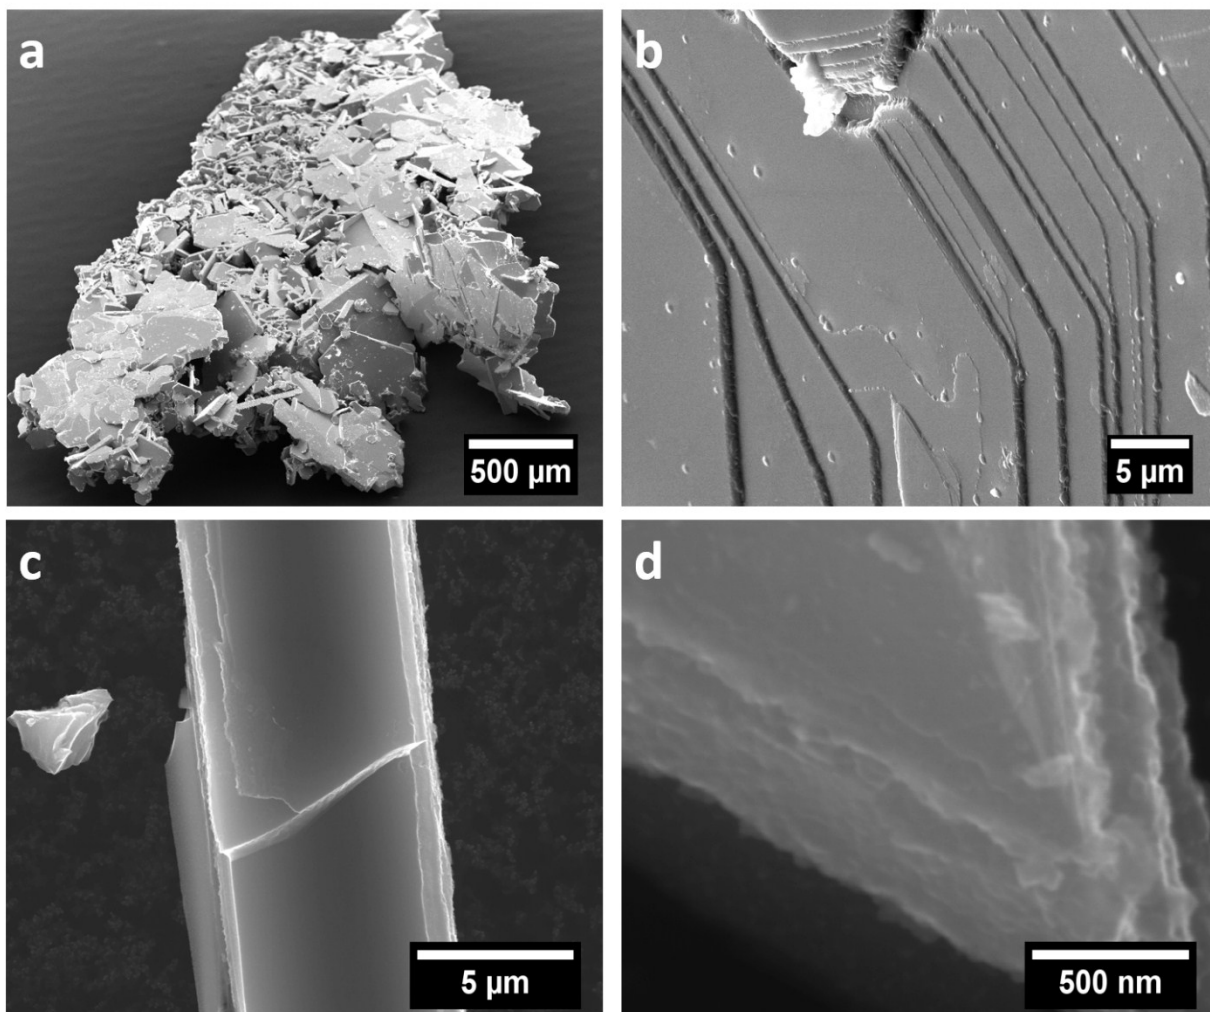

**Figure S3.** SEM image of (a,b) TiSe<sub>2</sub> crystals and (c,d) TiTe crystals at different magnifications showing (a,c) overview of the crystals and (b,d) the layered structure of these crystals.

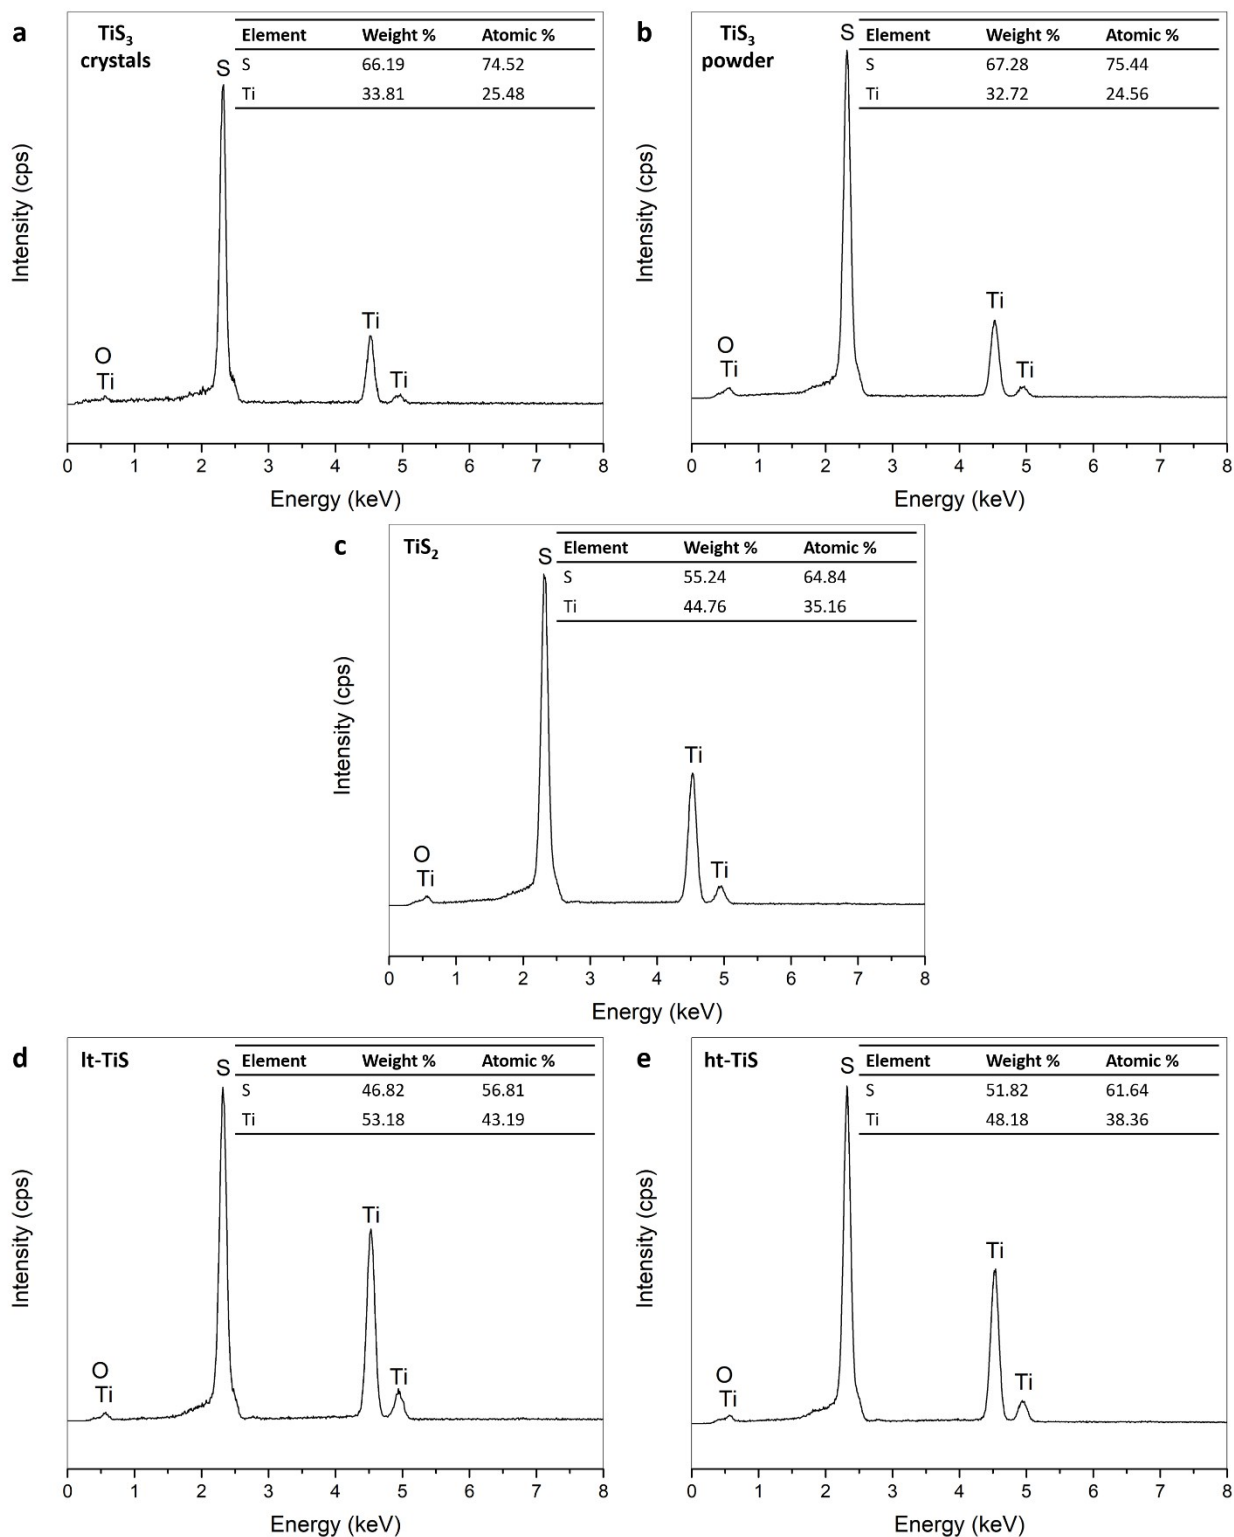

**Figure S4.** EDX analysis of (a) TiS<sub>3</sub> crystals, (b) TiS<sub>3</sub> powder, (c) TiS<sub>2</sub>, (d) low temperature TiS (lt-TiS) and (e) high temperature TiS (ht-TiS) showing the weight and atomic percentages of the elements sulfur and titanium in these materials.

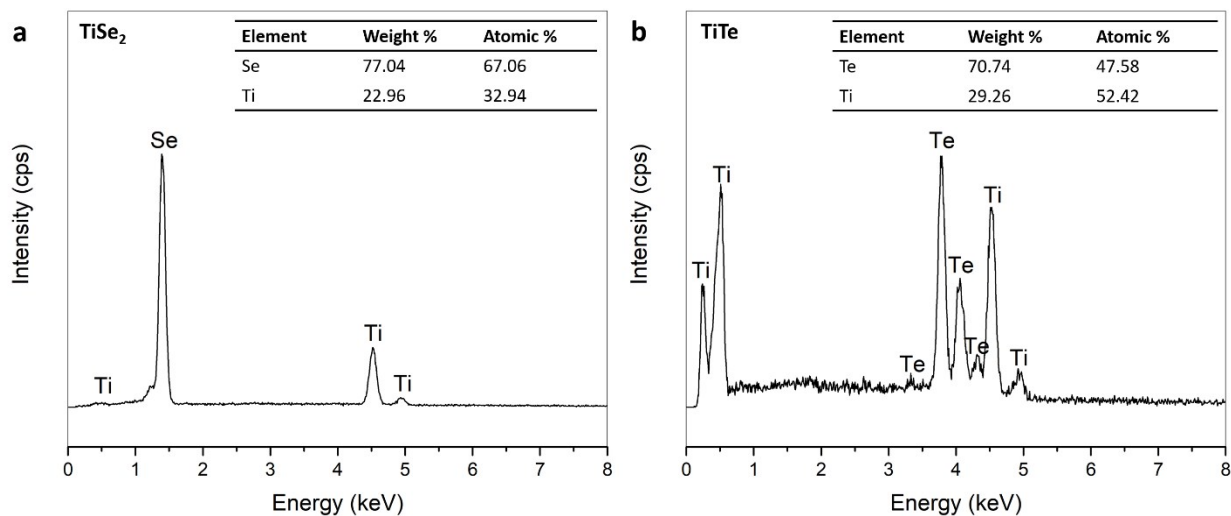

**Figure S5.** EDX analysis of (a) TiSe<sub>2</sub> and (b) TiTe showing the weight and atomic percentages of the elements in these materials.

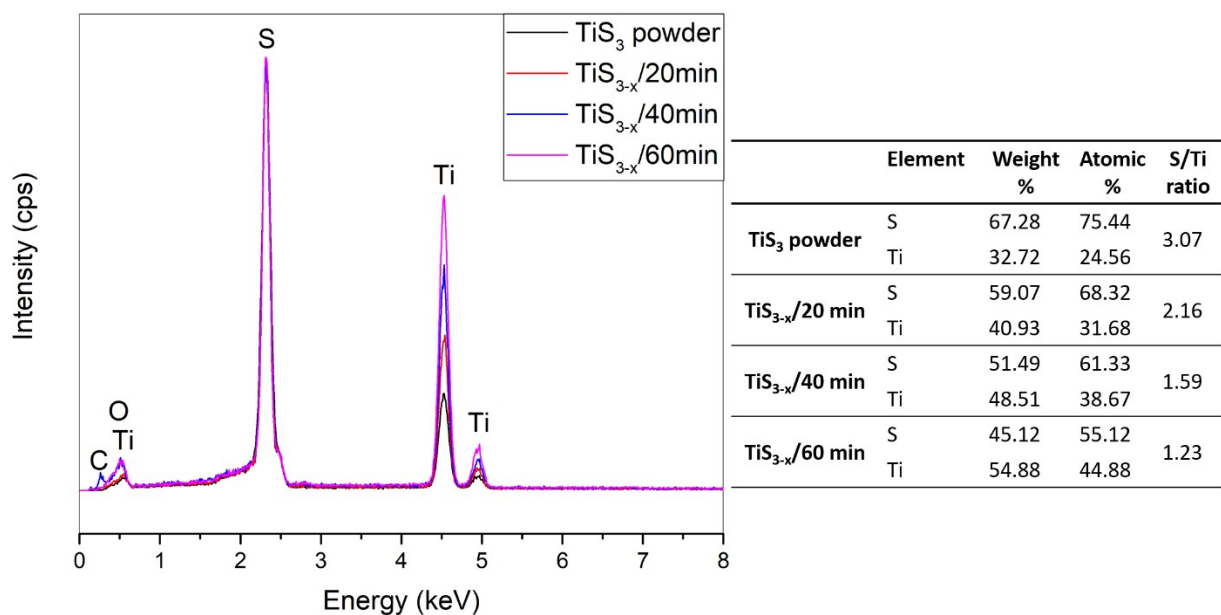

**Figure S6.** EDX analysis of TiS<sub>3</sub> powder before and after heat treatment at 450°C under argon atmosphere for 20 min, 40 min and 60 min for sulfur removal showing the change in the weight and atomic percentages of titanium and sulfur and the resulting decrease in the S/Ti ratio.

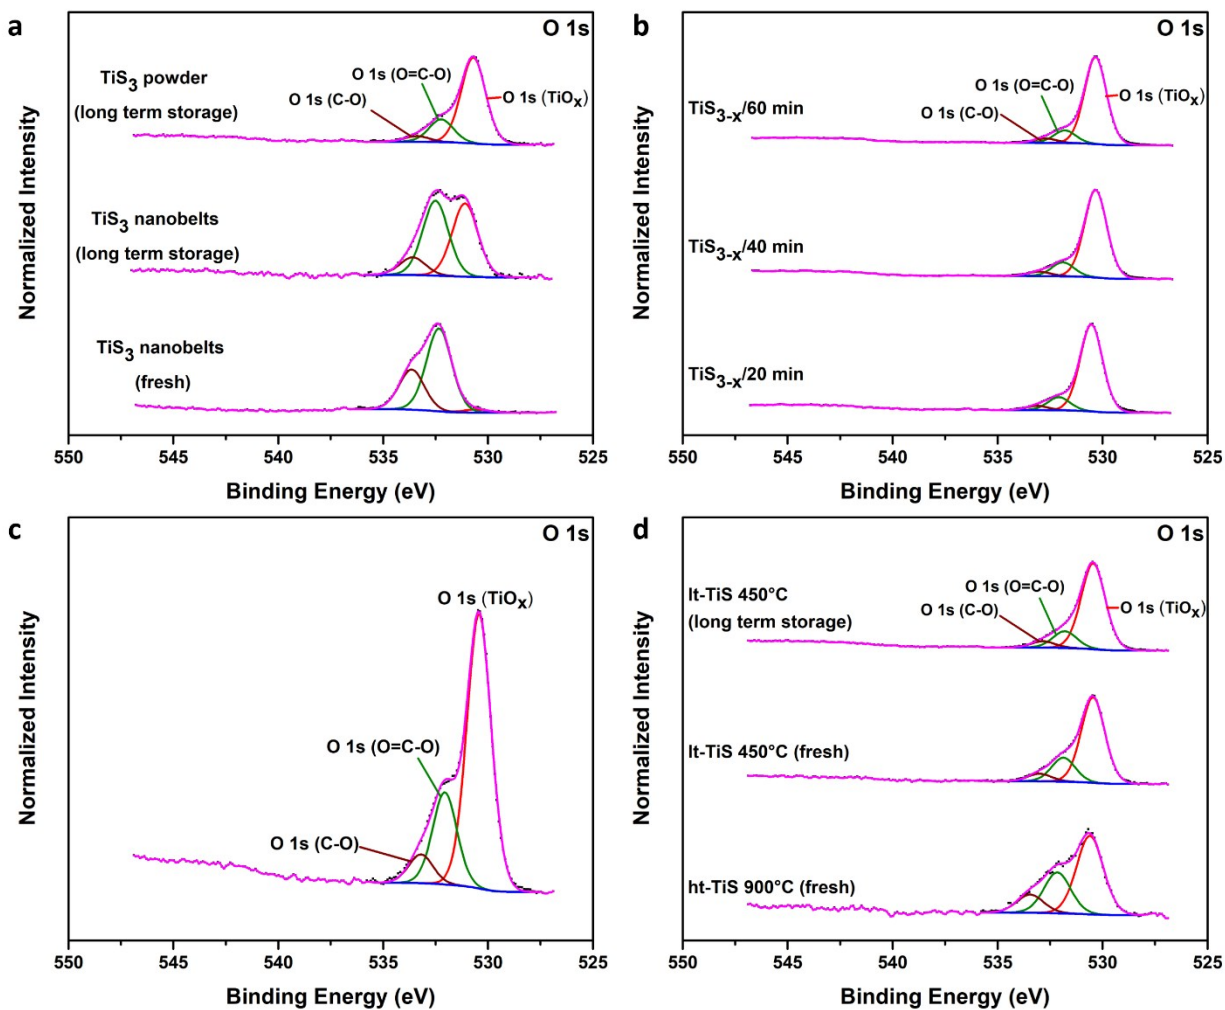

**Figure S7.** High-resolution XPS deconvoluted O 1s core level spectra of (a)  $\text{TiS}_3$  powder and nanobelt crystals (freshly prepared and after two years of storage), (b)  $\text{TiS}_3$  powder treated at  $450^\circ\text{C}$  under argon for 20 min, 40 min and 60 min, (c)  $\text{TiS}_2$  and (d) low temperature TiS (freshly prepared and after two years of storage) and high temperature TiS.

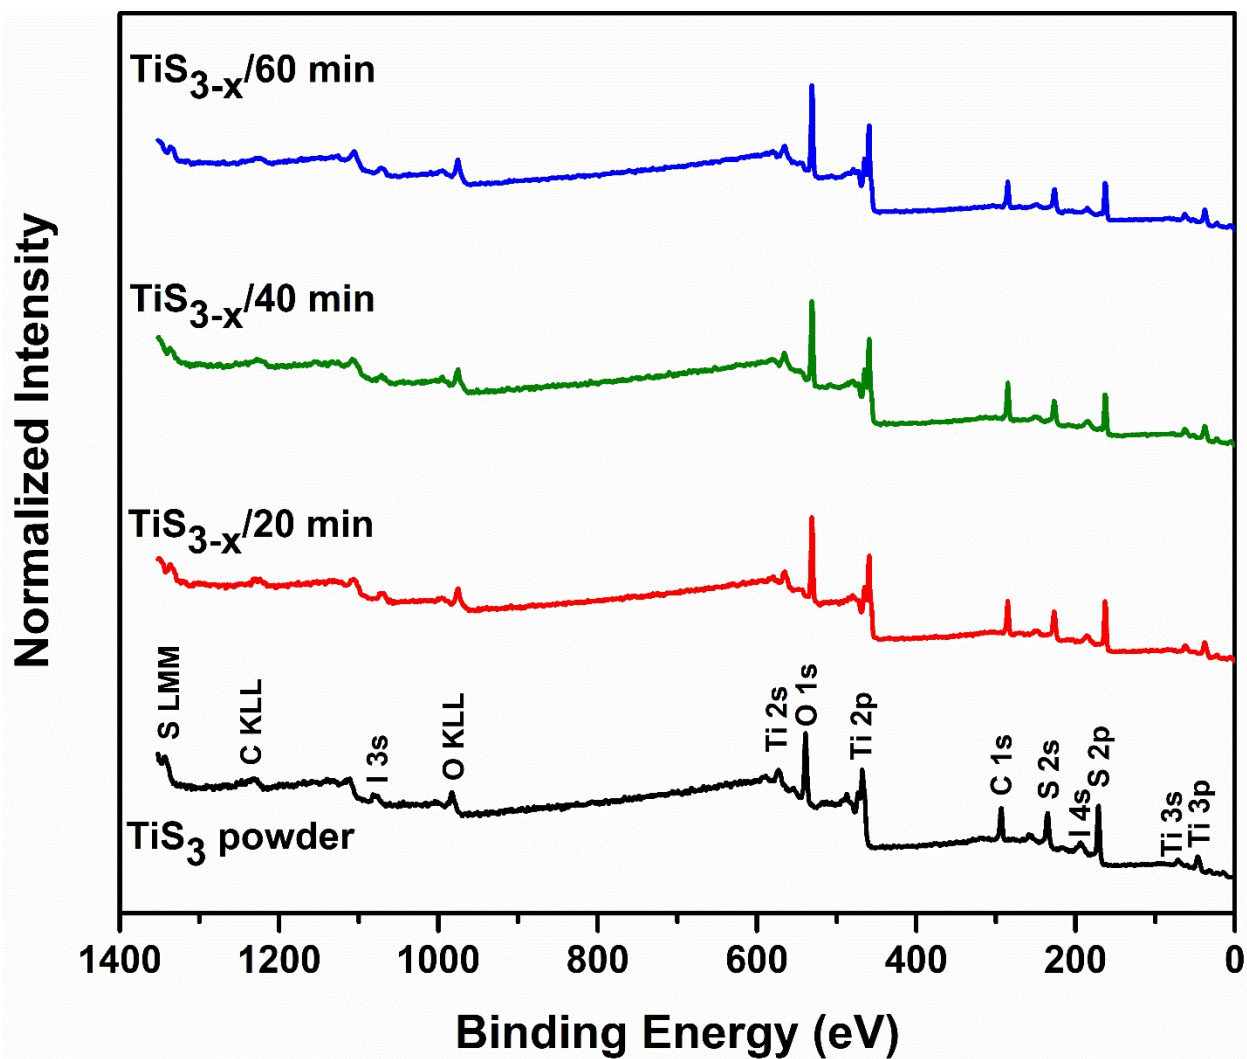

**Figure S8.** XPS survey spectra of TiS<sub>3</sub> powder and heat treated TiS<sub>3</sub> powder at 450°C for 20, 40 and 60 min (TiS<sub>3-x</sub>/20min, TiS<sub>3-x</sub>/40min, TiS<sub>3-x</sub>/60min).

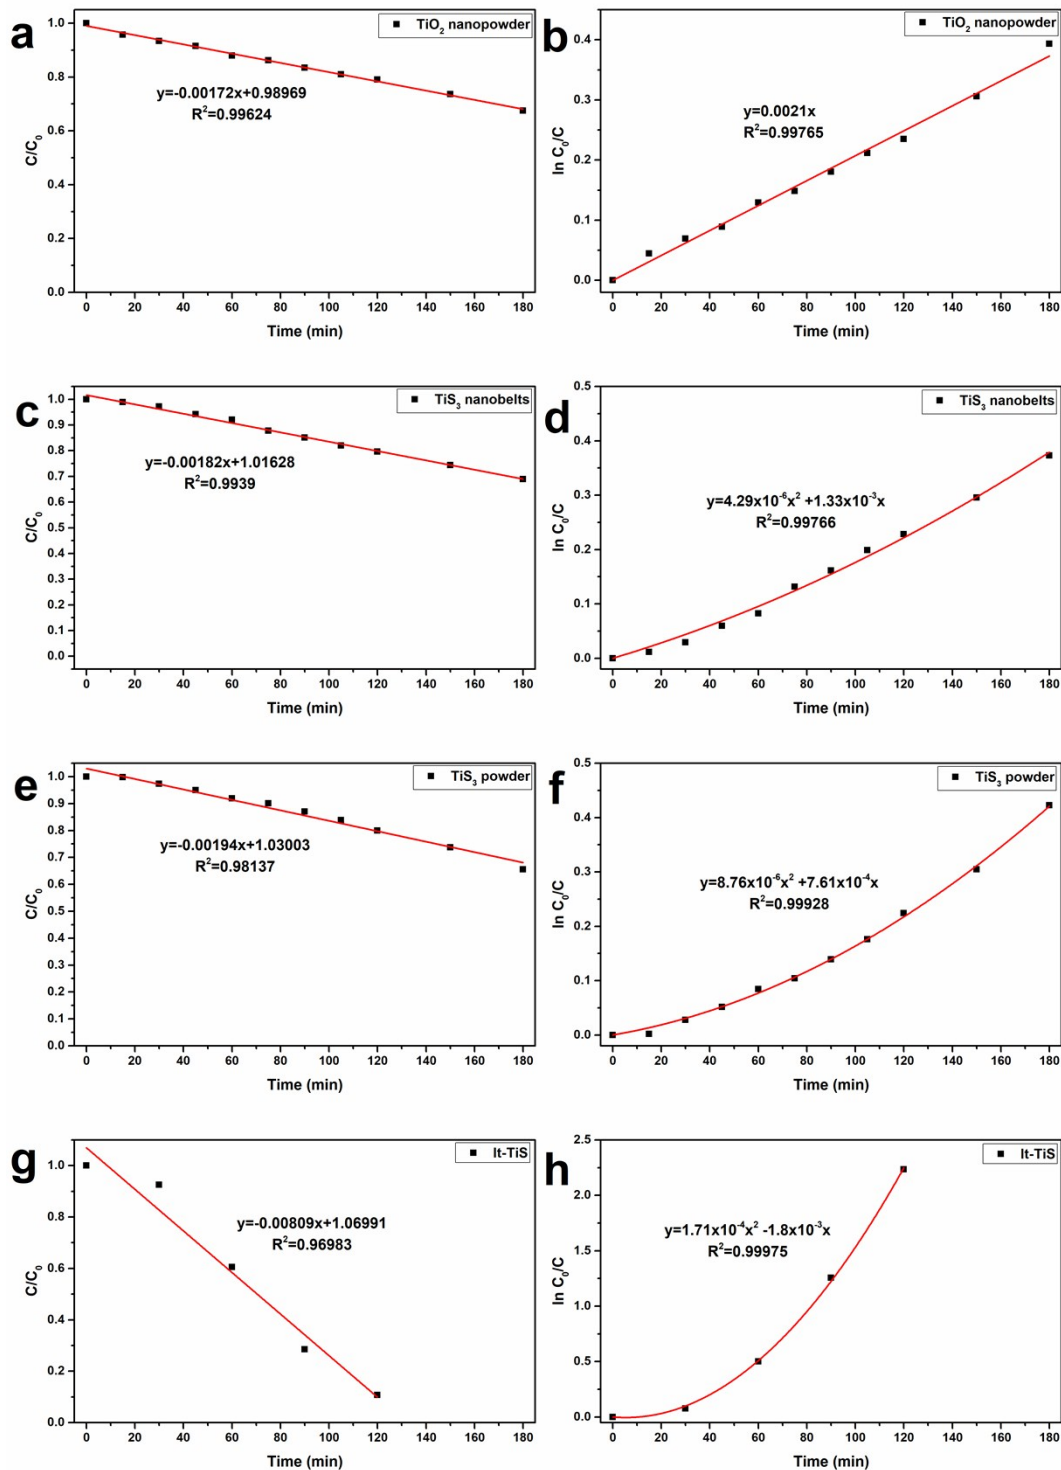

**Figure S9.** Zero order and first order plots of (a,b)  $\text{TiO}_2$  nanoparticles (EMPROVE<sup>®</sup> ESSENTIAL Ph Eur,BP,USP,JP,E 171, Merck), (c,d)  $\text{TiS}_3$  nanobelts, (e,f)  $\text{TiS}_3$  powder and (g,h) It-TiS for determination of the order of reaction for the different catalysts.



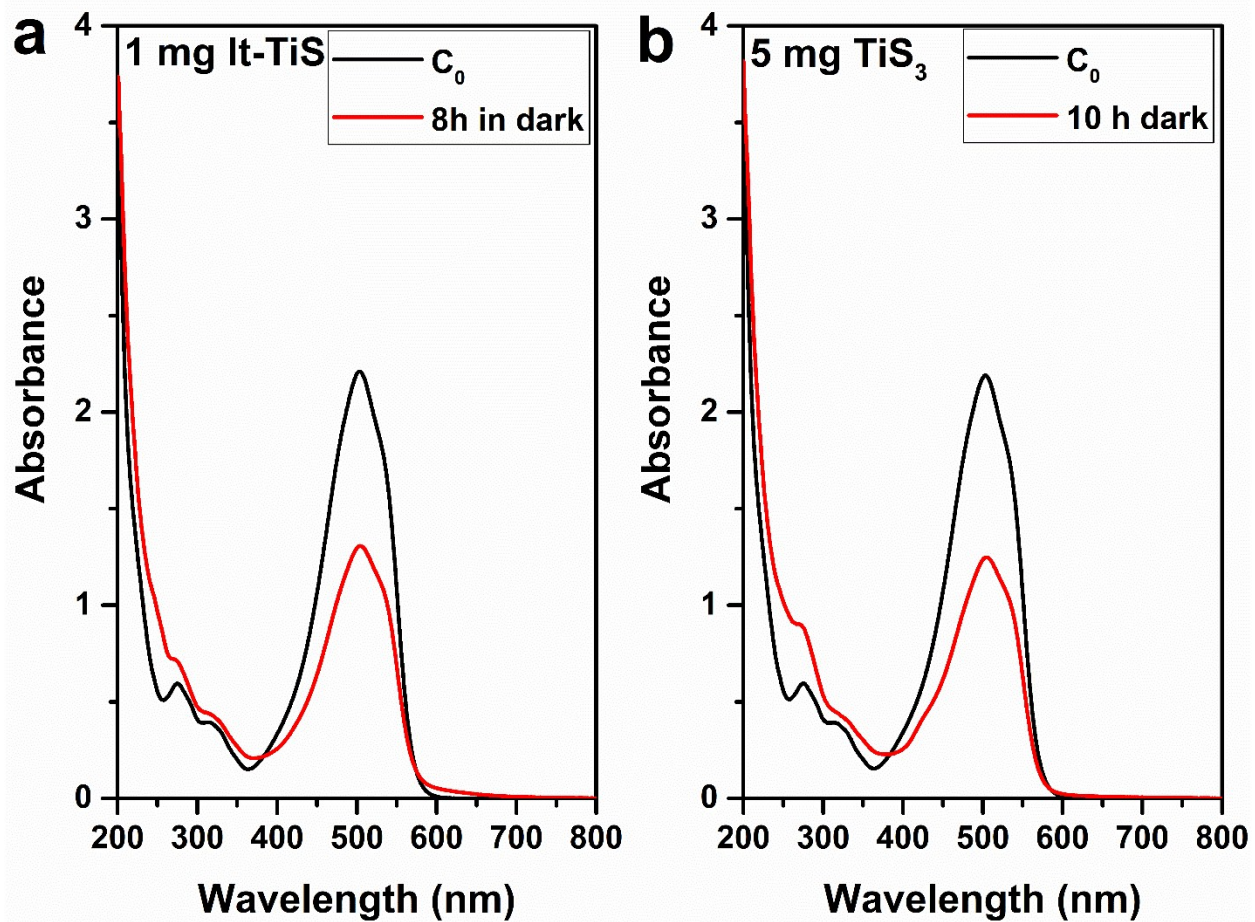

**Figure S10.** UV-VIS absorption spectra of methyl orange showing the thermocatalytic activity of (a) one mg of lt-TiS and (b) 5 mg of  $TiS_3$  nanobelts at room temperature in the degradation of methyl orange.

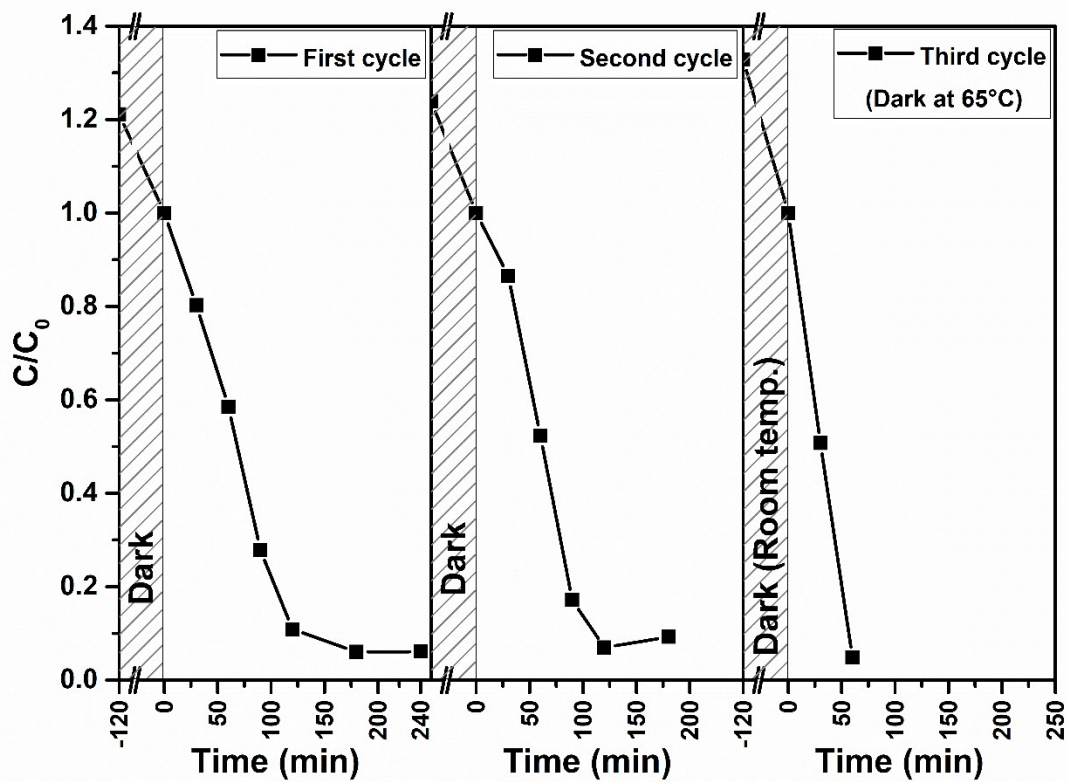

**Figure S11.** Recyclability of 5 mg  $\text{TiS}_3$  powder over three cycles where the first two cycles are performed using simulated sunlight and the third cycle is performed in dark at  $65^\circ\text{C}$  to show the thermocatalytic activity.

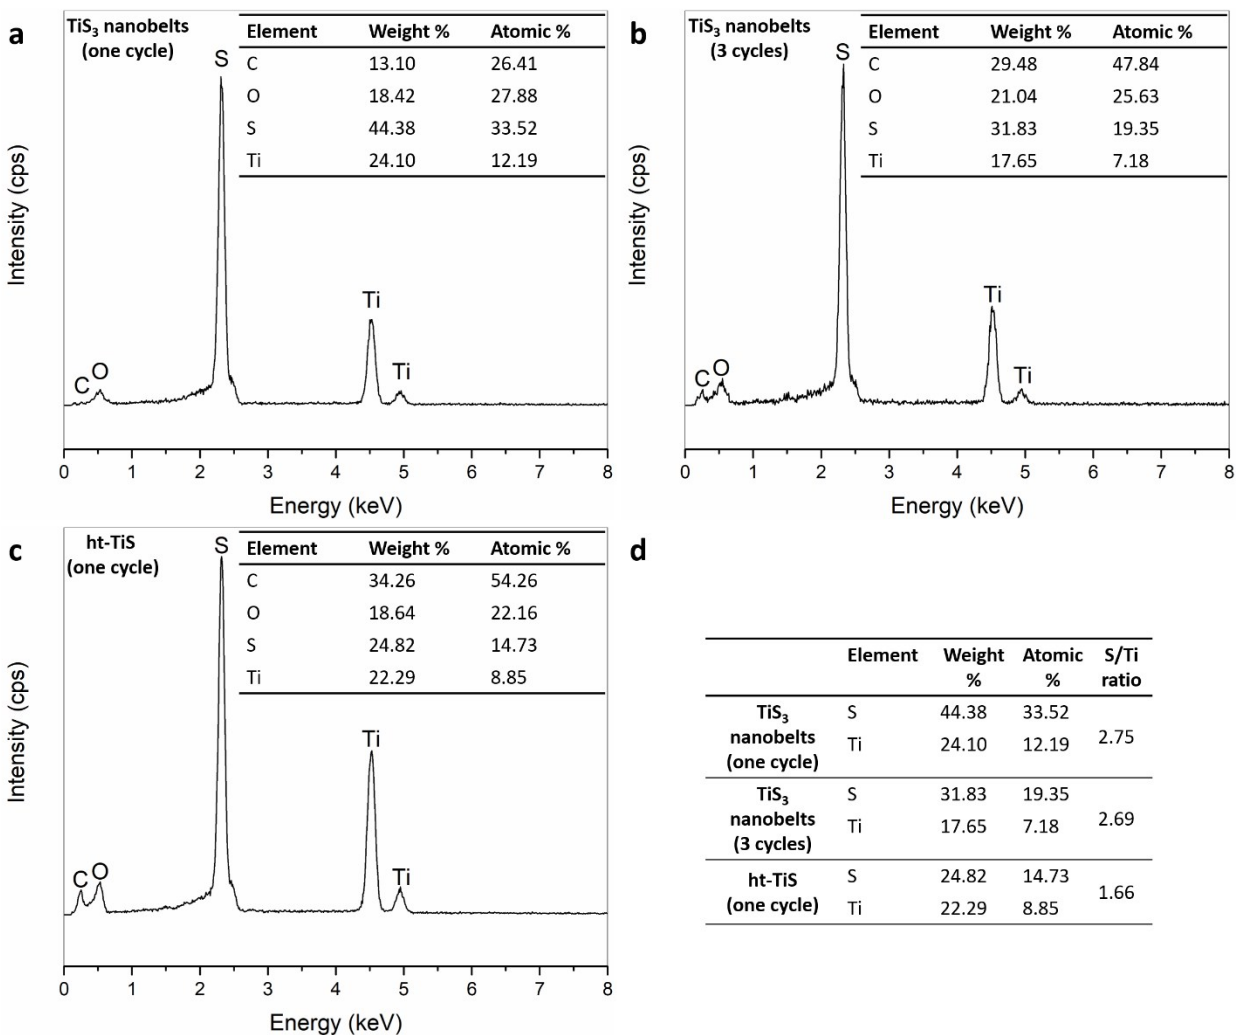

**Figure S12.** EDX analysis of (a)  $\text{TiS}_3$  nanobelts after one photocatalytic cycle, (b)  $\text{TiS}_3$  nanobelts after three photocatalytic cycles and (c) ht-TiS after one photocatalytic cycles showing the weight and atomic percentages of the elements in these materials, (d) the weight and atomic percentages of sulfur and titanium in each case and the corresponding S/Ti ratio.
